# Supplementary material
Source: PubMed Central journal article supplement (PMC3009884)
Supplement: supp_M110.190025_jbc.M110.190025-1.pdf [file supp_M110.190025_jbc.M110.190025-1.pdf]

## SUPPLEMENTAL INFORMATION

### Regulation of Angiogenesis by Histone Chaperone HIRA-Mediated Incorporation of Lysine 56-Acetylated Histone H3.3 at Chromatin Domains of Endothelial Genes

Debasree Dutta, Soma Ray, Pratik Home, Shoujian Wang, Nader Sheibani, Ossama Tawfik, Nikki Cheng, and Soumen Paul

**Supplemental Table 1: Oligonucleotides used for RT-PCR and ChIP analyses.**

| <b>Primers used for RT-PCR Analysis</b>                  |                            |                            |
|----------------------------------------------------------|----------------------------|----------------------------|
| Genes                                                    | Forward sequence (5'-3')   | Reverse sequence (5'-3')   |
| VEGFR1                                                   | CGAAGAAAAAGAAAGCGGAATC     | TGGGTATGTCAGTGTGCATCTCTA   |
| HIRA                                                     | CAGGAGGATGACGAGAAGGA       | ACTGTTTGACCACCGCACAC       |
| CAF1-p150                                                | GCACCTTCCTCAGTGACCTAAA     | CACCTTGCTGCTCTCCACA        |
| CBP                                                      | GGTCAATAGTTTACCTGCTTTTCT   | CCTGTTGCAATTGCTTGTGT       |
| Sphk1                                                    | GGCTCTGCAGCTCTTCCA         | CTCCCTGGCATGGTTCTTC        |
| Ereg                                                     | CATGGCCAGTGCATCTACCT       | AGTGCTCACATCGCAGACC        |
| Fgf1                                                     | CGAAGTGTATATAAAGGGTACGGAGA | GAACAGACATTCTCATTGGTG      |
| PIGF                                                     | GCCGATAAAGACAGCCAACA       | TGAGAAAATGTCATCTCCACATAGAA |
| CCl2                                                     | CAGCAGGTGTCCCAAAGAAG       | TTCCGATCCAGGTTTTTAATGT     |
| Efnb2                                                    | TTTCAAGAATTCAGCCCTAACC     | TATCCAGGCCCTCCAAAGA        |
| Plxdc1                                                   | CAACCATAACTACTACGTGTCCC    | AGGTCCACCCACAGATCCTG       |
| Pdgfa                                                    | GAGGAAGCCGAGATACCCC        | TGCTGTGGATCTGACTTCGAG      |
| Cxcl1                                                    | CTGGGATTCACCTCAAGAACATC    | CAGGGTCAAGGCAAGCCTC        |
| Cxcl5                                                    | TCCAGCTCGCCATTCATGC        | TTGCGGCTATGACTGAGGAAG      |
| Polr2a                                                   | CGAATCCGCATCATGAACAG       | TGCATCGCAGGAAGACATCA       |
| Rpl27                                                    | GGACGCAAAGCCGTCATC         | GGTCAATTCCAGCCACCA         |
| Gapdh                                                    | TGCCCCCATGTTTGTGATG        | TGTGGTCATGAGCCCTTCC        |
| <b>Primers used for ChIP Analysis (Promoter regions)</b> |                            |                            |
| Genes                                                    | Forward sequence (5'-3')   | Reverse sequence (5'-3')   |
| VEGFR1                                                   | TGACGTCCTGGAAGGAGGTG       | AGGACCTCGCTGAAGTGCA        |
| Sphk1                                                    | ACCTCCAATCCTTCCAGAG        | CGGGAATGGACAAGAACAAG       |
| Ereg                                                     | GGGGTGGCATTAGGAAA          | CCTTTATAAGTCTGGGAGGTG      |
| Angpt1                                                   | CAGCAAGCACACCCGAAC         | CCTTAGCAGATGCACGGAAA       |
| Fgf1                                                     | TGCAGACTGTGAAGAGCTAGAGG    | CCACATCAGTGCACAACAAA       |
| PIGF                                                     | CATCTCCAAGGCAGATGTTG       | CGGAGCTAGGCGTTCATTAG       |
| CCl2                                                     | GCAGCCAGAAGTGCAGAGAG       | TCAGTGAGAGTTGGCTGGTG       |
| Efnb2                                                    | GTGCTCTCCTGACTGCTTAGTG     | CTGGAGCGCAGAGATAAAGG       |
| Pdgfa                                                    | AGACAGGTGATCGGTGGTG        | CGTCGCTGGCTTTAGGAG         |
| Plxdc1                                                   | ACACCAGGAAGCCACAGAAG       | CACCACCCATCCCAAGAG         |
| Cxcl1                                                    | TGGAGTTTCGAGCATAAAAGG      | TGGAGTGCTGGAAGTGGTTAG      |
| Cxcl5                                                    | CCTGCCTGAAGGAAGAGAGA       | TGGAGGAGGTGTGGAGATTG       |
| Tie-2                                                    | TGAAGGGCAAGATGGATAGG       | GCAGATTAGGATGGGAAAGG       |
| Polr2a                                                   | GCGAATCTATAAAGGGCGTCACT    | TCGGCGCTTCTGAGGAGA         |
| Rpl27                                                    | GGGGACTACAGCAATGAAGG       | GAGGGAGGAGCGAGGATC         |
| Necdin                                                   | GGTCTGCTCTGATCCGAAG        | GGGTCGCTCAGGTCCTTACTT      |

Primers used for measuring H3acK56 incorporation at other regions of mouse *Vegfr1* locus is available on request.

**Supplemental Table 2: Fold Changes in mRNA expression of angiogenic genes in starved YSECs and HUVECs after they were treated with FGF2/EGF for 3 h. Genes that are induced in both cell types are underlined.**

| YSEC           |             | HUVEC          |             |
|----------------|-------------|----------------|-------------|
| Gene           | Fold Change | Gene           | Fold Change |
| <u>Ereg</u>    | 48.24697771 | <u>FGFR3</u>   | 21.52786484 |
| <u>Sphk1</u>   | 35.67067637 | <u>PLXDC1</u>  | 12.25784391 |
| <u>Lep</u>     | 27.09710212 | <u>VEGFC</u>   | 10.26835613 |
| <u>Vegfr1</u>  | 16.27365794 | <u>IL8</u>     | 9.516514907 |
| <u>Ctgf</u>    | 12.15743242 | <u>FGF1</u>    | 8.388037628 |
| <u>Pgf</u>     | 11.17936754 | <u>BAI1</u>    | 6.492316502 |
| <u>Ccl2</u>    | 10.59643285 | <u>EREG</u>    | 6.291652706 |
| <u>Thbs1</u>   | 9.657613092 | <u>CXCL1</u>   | 4.834773236 |
| <u>Cxcl1</u>   | 7.469784729 | <u>SPHK1</u>   | 4.147830627 |
| <u>Tgfa</u>    | 4.936767379 | <u>JAG1</u>    | 3.856877523 |
| <u>Efnb2</u>   | 4.164567473 | <u>CXCL5</u>   | 3.610000312 |
| <u>Fgf1</u>    | 3.515833297 | <u>VEGFR1</u>  | 3.565337851 |
| <u>Cxcl5</u>   | 2.807839582 | <u>PDGFA</u>   | 3.313218463 |
| <u>Csf3</u>    | 2.793098916 | <u>CXCL6</u>   | 3.256976552 |
| <u>Plxdc1</u>  | 2.788892466 | <u>IL6</u>     | 2.881526591 |
| <u>Pdgfa</u>   | 2.546456944 | <u>EFNB2</u>   | 2.600622765 |
| <u>Tgfb1</u>   | 2.40105203  | <u>CXCL3</u>   | 2.31679972  |
| <u>Mmp19</u>   | 2.054612983 | <u>HPSE</u>    | 2.282687445 |
| <u>Itgav</u>   | 2.029278206 | <u>IFNA1</u>   | 1.92283282  |
| <u>Plau</u>    | 2.009820512 | <u>TGFA</u>    | 1.879349429 |
| <u>Col18a1</u> | 1.902856367 | <u>ANGPT2</u>  | 1.827705129 |
| <u>Gna13</u>   | 1.808716964 | <u>THBS2</u>   | 1.636976185 |
| <u>Lect1</u>   | 1.807839582 | <u>IGF1</u>    | 1.486926498 |
| <u>Mmp9</u>    | 1.807839582 | <u>ID1</u>     | 1.36986463  |
| <u>Pecam1</u>  | 1.807839582 | <u>CXCL9</u>   | 1.345957945 |
| <u>Plg</u>     | 1.807839582 | <u>TGFB1</u>   | 1.293278813 |
| <u>Tnf</u>     | 1.807839582 | <u>TYMP</u>    | 1.290681769 |
| <u>Itgb3</u>   | 1.776905142 | <u>CXCL10</u>  | 1.276535212 |
| <u>Angpt2</u>  | 1.691691696 | <u>TIMP1</u>   | 1.264207548 |
| <u>Mapk14</u>  | 1.485621569 | <u>S1PR1</u>   | 1.255039989 |
| <u>Nrp1</u>    | 1.368852186 | <u>ITGB3</u>   | 1.22300757  |
| <u>Stab1</u>   | 1.357325436 | <u>IL1B</u>    | 1.154712211 |
| <u>Tgfb1</u>   | 1.302846093 | <u>CCL2</u>    | 1.151179336 |
| <u>Nrp2</u>    | 1.271707311 | <u>MDK</u>     | 1.120259789 |
| <u>Lama5</u>   | 1.211812646 | <u>TEK</u>     | 1.117777727 |
| <u>Kdr</u>     | 1.141843246 | <u>ENG</u>     | 1.058068721 |
| <u>Eng</u>     | 1.130426089 | <u>ID3</u>     | 1.047778187 |
| <u>Timp2</u>   | 1.067966702 | <u>ITGAV</u>   | 1.023728628 |
| <u>Ptgs1</u>   | 1.015835408 | <u>PF4</u>     | 0.98762368  |
| <u>Tnfaip2</u> | 0.983479351 | <u>PROK2</u>   | 0.975716096 |
| <u>Efna1</u>   | 0.936380416 | <u>PTGS1</u>   | 0.942544954 |
| <u>Tmprss6</u> | 0.887037294 | <u>ANPEP</u>   | 0.914042615 |
| <u>Egf</u>     | 0.79640085  | <u>COL18A1</u> | 0.901708692 |
| <u>Epas1</u>   | 0.736862156 | <u>NRP1</u>    | 0.870570678 |
| <u>Tgfb2</u>   | 0.713045808 | <u>THBS1</u>   | 0.870389666 |
| <u>Vegfa</u>   | 0.705034943 | <u>HIF1A</u>   | 0.860849733 |
| <u>Npr1</u>    | 0.66853114  | <u>CDH5</u>    | 0.85787142  |
| <u>Fgf2</u>    | 0.659510104 | <u>EPHB4</u>   | 0.854311041 |
| <u>Jag1</u>    | 0.617909161 | <u>PECAM1</u>  | 0.846882271 |
| <u>Smad5</u>   | 0.5942602   | <u>Akt1</u>    | 0.818942084 |
| <u>Vegfb</u>   | 0.545657153 | <u>B2M</u>     | 0.817184267 |
| <u>Igf1</u>    | 0.541024813 | <u>TIMP2</u>   | 0.788910385 |

|                 |                           |                 |                           |
|-----------------|---------------------------|-----------------|---------------------------|
| <i>Angpt1</i>   | 0.500127093               | <i>PLAU</i>     | 0.786344461               |
| <i>Mdk</i>      | 0.4847009                 | <i>ANGPTL4</i>  | 0.781562598               |
| <i>Vegfc</i>    | 0.469783083               | <i>TGFB2</i>    | 0.774444272               |
| <i>Hif1a</i>    | 0.466861546               | <i>LECT1</i>    | 0.749672992               |
| <i>Fgfr3</i>    | 0.463090693               | <i>MMP2</i>     | 0.740685671               |
| <i>Mmp2</i>     | 0.460115087               | <i>HAND2</i>    | 0.729830492               |
| <i>Ephb4</i>    | 0.432468412               | <i>IFNG</i>     | 0.729830492               |
| <i>Fzd5</i>     | 0.40826185                | <i>PLG</i>      | 0.729830492               |
| <i>Figf</i>     | 0.380763387               | <i>TIMP3</i>    | 0.729830492               |
| <i>Tnfsf12</i>  | 0.373988721               | <i>ANGPT1</i>   | 0.700197266               |
| <i>Tgfb3</i>    | 0.348074171               | <i>TNFAIP2</i>  | 0.699178794               |
| <i>Serpinf1</i> | 0.16807379                | <i>STAB1</i>    | 0.688788678               |
| <i>Bai1</i>     | No Significant expression | <i>VEGFA</i>    | 0.657030994               |
| <i>Anpep</i>    | No Significant expression | <i>FGF2</i>     | 0.63289292                |
| <i>Col4a3</i>   | No Significant expression | <i>COL4A3</i>   | 0.626954796               |
| <i>S1pr1</i>    | No Significant expression | <i>NRP2</i>     | 0.603168643               |
| <i>Timp1</i>    | No Significant expression | <i>LAMA5</i>    | 0.586024682               |
| <i>Tymp</i>     | No Significant expression | <i>LEP</i>      | 0.540300279               |
| <i>Il1b</i>     | No Significant expression | <i>NOTCH4</i>   | 0.530871035               |
| <i>Hand2</i>    | No Significant expression | <i>EGF</i>      | 0.527167499               |
| <i>Ccl11</i>    | No Significant expression | <i>KDR</i>      | 0.444554849               |
| <i>Cdh5</i>     | No Significant expression | <i>TGFBR1</i>   | 0.435617354               |
| <i>Cxcl2</i>    | No Significant expression | <i>EFNA3</i>    | 0.389294356               |
| <i>F2</i>       | No Significant expression | <i>SERPINF1</i> | 0.358695943               |
| <i>Fgf6</i>     | No Significant expression | <i>FIGF</i>     | 0.322737547               |
| <i>Hgf</i>      | No Significant expression | <i>PGF</i>      | 0.309311705               |
| <i>Ifng</i>     | No Significant expression | <i>MMP9</i>     | 0.307026127               |
| <i>Il6</i>      | No Significant expression | <i>ANGPTL3</i>  | 0.282012953               |
| <i>Tbx1</i>     | No Significant expression | <i>TNF</i>      | 0.235538261               |
| <i>Tbx4</i>     | No Significant expression | <i>EFNA1</i>    | 0.079221363               |
| <i>Tek</i>      | No Significant expression | <i>HGF</i>      | No Significant expression |
| <i>Thbs2</i>    | No Significant expression | <i>IFNB1</i>    | No Significant expression |
|                 |                           | <i>CCL11</i>    | No Significant expression |

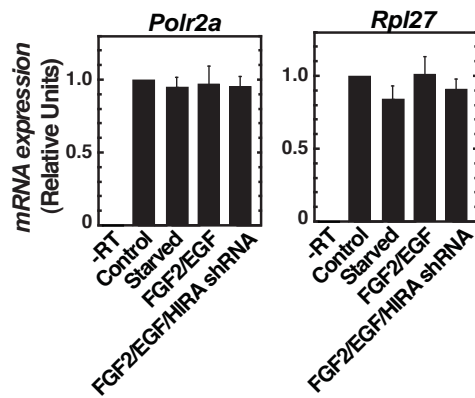

**Figure S1.** YSECs were infected with lentiviral vectors expressing HIRA shRNA, starved from growth factors for over night, treated with FGF2/EGF containing medium for 3h, and mRNA expression of constitutive genes *Polr2a* and *Rpl27* were measured. The plot shows relative mRNA expression levels in HIRAKd YSECS when they are starved and treated with FGF2/EGF with respect to the uninfected control YSECs.

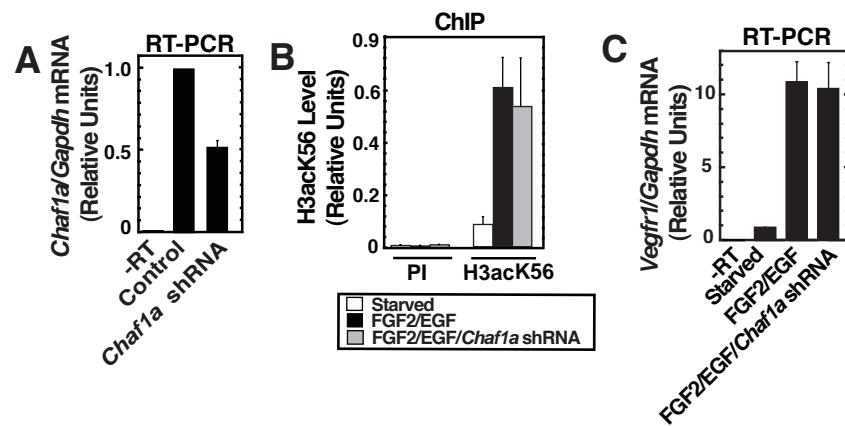

**Figure S2.** A, YSECs were infected with lentiviral particles expressing shRNA against the CAF1p150 (*Chaf1a*) and RT-PCR analysis were performed to determine mRNA expression with respect to the control, uninfected, YSECs. B, and C, ChIP and RT-PCR analysis, respectively, showing knockdown of CAF1p150 expression does not inhibit FGF2/EGF-induced H3acK56 incorporation and transcription at the *Vegfr1* locus.

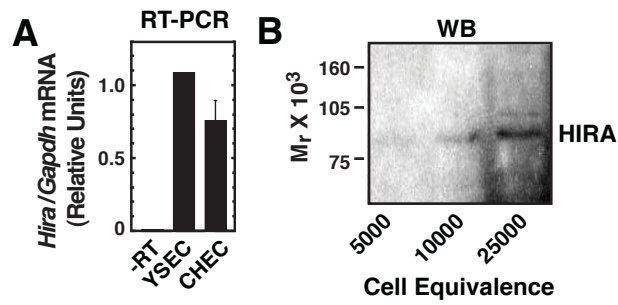

**Figure S3.** A, RT-PCR analysis showing Hira mRNA expression in mouse choroidal endothelial cells (CHEC) with respect to that in YSECs. B, Western blot analysis with increasing concentrations of CHEC extracts showing HIRA protein expression.
